# Supplementary material for: Differences in the Genital Microbiota in Women Who Naturally Clear Chlamydia trachomatis Infection Compared to Women Who Do Not Clear; A Pilot Study
Source: PubMed Central journal article supplement (PMC8072278; doi:10.3389/fcimb.2021.615770), 2021-04-12
Supplement: Table_1.pdf [file Table_1.pdf]

| Cytokine       | Clearers (n=8)           | Persisting (n=26)      | P-value |
|----------------|--------------------------|------------------------|---------|
| IFN $\gamma$   | 1.24 (0.91-8.09)         | 0.97 (0.4-54.53)       | 0.25    |
| IL-17A         | 1.72 (0.35-62.66)        | 0.90 (0.35-43.24)      | 0.08    |
| IL-1 $\alpha$  | 121.89 (28.38-1285.74)   | 121.46 (4.7-11643.96)  | 0.66    |
| IL-1 $\beta$   | 8.59 (1.32-182.72)       | 10.12 (0.4-2805.42)    | 0.96    |
| IL-6           | 3.84 (1.61-120.35)       | 2.53 (0.45-112.42)     | 0.38    |
| IL-8           | 1283.26 (139.95-6836.67) | 516.98 (27.97-8754.11) | 0.27    |
| IP-10          | 111.46 (26.82-13658.07)  | 67.70 (9.06-4097.62)   | 0.37    |
| MIP-1 $\alpha$ | 1.45 (1.45-46.27)        | 2.51 (1.45-126.49)     | 0.92    |
| MIP-1 $\beta$  | 1.5 (1.5-50.3)           | 1.5 (1.5-96.93)        | 0.84    |
| RANTES         | 11.565 (1.7-135.17)      | 7.01 (0.6-405.25)      | 0.74    |
| TNF $\alpha$   | 1.025 (0.35-16.33)       | 0.83 (0.35-71.74)      | 0.50    |
