# Supplementary material for: Differences in the Genital Microbiota in Women Who Naturally Clear Chlamydia trachomatis Infection Compared to Women Who Do Not Clear; A Pilot Study
Source: PubMed Central journal article supplement (PMC8072278; doi:10.3389/fcimb.2021.615770), 2021-04-12
Supplement: Table_2.pdf [file Table_2.pdf]

| Cytokine       | BV-CST negative (n=17)  | BV-CST positive (n=17) | P-value |
|----------------|-------------------------|------------------------|---------|
| IFN $\gamma$   | 1.2 (0.4-8.09)          | 0.95 (0.4-54.53)       | 0.94    |
| IL-17A         | 0.93 (0.35-62.66)       | 1.15 (0.35-43.24)      | 0.69    |
| IL-1 $\alpha$  | 71.06 (20.42-1728.35)   | 350.50 (4.7-11643.96)  | 0.00003 |
| IL-1 $\beta$   | 8.12 (0.4-120.81)       | 14.43 (1.70-2805.42)   | 0.009   |
| IL-6           | 4.56 (0.91-120.35)      | 1.84 (0.45-112.42)     | 0.06    |
| IL-8           | 564.51 (103.79-6836.67) | 606.27 (27.97-8754.11) | 0.67    |
| IP-10          | 329.45 (26.82-13658.07) | 51.92 (9.06-245.83)    | 0.0003  |
| MIP-1 $\alpha$ | 1.45 (1.45-46.27)       | 1.45 (1.45-126.49)     | 0.52    |
| MIP-1 $\beta$  | 1.5 (1.5-50.3)          | 1.5 (1.5-96.93)        | 0.93    |
| RANTES         | 7.56 (1.67-405.25)      | 7.67 (0.6-202.49)      | 0.39    |
| TNF $\alpha$   | 1 (0.35-16.33)          | 0.89 (0.35-71.74)      | 0.32    |
